# Supplementary material
Source: publisher figshare collection journal article supplement (https://asha.figshare.com/articles/dataset/_/21561714)
Supplement: Supplementary file 1 [file 1]

|                          | EA<br>(35 m) | EA/CA | EA<br>(48 m) | EA/CA | EA<br>(49 m) | EA/CA | EA<br>(86 m) | EA/CA |
|--------------------------|--------------|-------|--------------|-------|--------------|-------|--------------|-------|
| Social/Personal          | 22           | 0,63  | 35           | 0,73  | 45           | 0,76  | 35           | 0,4   |
| Adaptive                 | 23           | 0,65  | 37           | 0,77  | 42           | 0,71  | 51           | 0,6   |
| Gross Motor Skills       | 24           | 0,68  | 44           | 0,91  | 50           | 0,84  | 74           | 0,86  |
| Fine Motor Skills        | 29           | 0,82  | 32           | 0,66  | 46           | 0,78  | 69           | 0,80  |
| Total Motor              | 27           | 0,77  | 35           | 0,73  | 48           | 0,81  | 73           | 0,84  |
| Receptive Communication  | 14           | 0,4   | 26           | 0,54  | 39           | 0,66  | 65           | 0,75  |
| Expressive Communication | 15           | 0,42  | 28           | 0,58  | 42           | 0,71  | 50           | 0,58  |
| Total Communication      | 14           | 0,4   | 25           | 0,52  | 40           | 0,67  | 54           | 0,62  |
| Total Cognitive          | 25           | 0,71  | 39           | 0,81  | 49           | 0,83  | 75           | 0,87  |
| TOTAL                    | 23           | 0,65  | 35           | 0,73  | 47           | 0,79  | 58           | 0,67  |

**Supplemental Material S2.** Scores of the Battelle Developmental Inventory at 35, 48, 59 and 86 months of age.

*Note.* CA = Chronological Age; EA = Equivalent Age.
