# Supplementary material
Source: publisher figshare collection journal article supplement (https://asha.figshare.com/articles/dataset/_/21561714)
Supplement: Supplementary file 2 [file 1]

| <b>Full Scale</b>                | <b>Sum of<br/>scaled scores</b> | <b>Standard<br/>score</b> | <b>Percentil<br/>rank</b> | <b>Standard<br/>score CI</b> | <b>Qualitative<br/>classification</b> | <b>Normal curve<br/>equivalent</b> |
|----------------------------------|---------------------------------|---------------------------|---------------------------|------------------------------|---------------------------------------|------------------------------------|
| Verbal Comprehension Index (VCI) | 16                              | 89                        | 23                        | 82-99                        | Medium-Low                            | 3.97                               |
| Visual Spatial Index (VSI)       | 22                              | 105                       | 63                        | 96-113                       | Medium                                | 4.97                               |
| Fluid Reasoning Index (FRI)      | 22                              | 106                       | 66                        | 98-113                       | Medium                                | 3.67                               |
| Working Memory Index (WMI)       | 22                              | 107                       | 68                        | 98-114                       | Medium                                | 4.24                               |
| Processing Speed Index (PSI)     | 17                              | 92                        | 30                        | 84-102                       | Medium                                | 5.20                               |
| Total Scale (TS)                 | 65                              | 95                        | 37                        | 89-101                       | Medium                                | 3.00                               |

**Supplemental Material S4.** The Wechsler Intelligence for Children. Fifth Edition (WISC-V). Summary of Composite Scores (Primary Index Scales).

*Note.* Confidence intervals for Standard Scores (5<sup>th</sup> column) have been calculated with a Typical Error of Measurement of 95%
