# Supplementary material
Source: publisher figshare collection journal article supplement (https://asha.figshare.com/articles/dataset/_/21561714)
Supplement: Supplementary file 3 [file 1]

|                                            | <b>Core<br/>Language<br/>CLI</b> | <b>Receptive<br/>Language<br/>RLI</b> | <b>Expressive<br/>Language<br/>ELI</b> | <b>Language<br/>Content<br/>LCI</b> | <b>Language<br/>Structure<br/>LSI</b> | <b>Working<br/>Memory<br/>WMI</b> |
|--------------------------------------------|----------------------------------|---------------------------------------|----------------------------------------|-------------------------------------|---------------------------------------|-----------------------------------|
| <b>Concepts &amp; Following Directions</b> | 13                               | 13                                    |                                        | 13                                  |                                       |                                   |
| <b>Word Structure</b>                      | 7                                |                                       | 7                                      |                                     | 7                                     |                                   |
| <b>Recalling Sentences</b>                 | 6                                |                                       | 6                                      |                                     | 6                                     |                                   |
| <b>Formulated Sentences</b>                | 7                                |                                       | 7                                      |                                     | 7                                     |                                   |
| Word Classes 1(Comprehension)              |                                  | 12                                    |                                        |                                     |                                       |                                   |
| Word Classes-Total                         |                                  |                                       |                                        | 20                                  |                                       |                                   |
| Sentence Structure                         |                                  | 9                                     |                                        |                                     | 9                                     |                                   |
| Expressive Vocabulary                      |                                  |                                       |                                        | 13                                  |                                       |                                   |
| Number Repetition-Total                    |                                  |                                       |                                        |                                     |                                       | 8                                 |
| Familiar Sequences 1                       |                                  |                                       |                                        |                                     |                                       | 16                                |
| Sum of subtest Scaled Scores               | 33                               | 34                                    | 20                                     | 46                                  | 29                                    | 24                                |
| Standard Score                             | 89                               | 109                                   | 80                                     | 109                                 | 82                                    | 112                               |
| Standard Score Points +/-                  | 6                                | 10                                    | 6                                      |                                     |                                       |                                   |
| Confidence Interval                        | 83 to 95                         | 99 to 119                             | 74 to 86                               | 102 to 116                          | 75 to 89                              | 104 to 120                        |
| Percentil Rank                             | 23                               | 73                                    | 9                                      | 73                                  | 12                                    | 79                                |
| <i>Severity Disorder</i>                   |                                  |                                       |                                        |                                     |                                       |                                   |
| Distance from Mean                         | Mean                             | Mean                                  | -1 to -1.5 SD                          | Mean                                | -1 to -1.5 SD                         | Mean                              |
| Classification                             | Average                          | Average                               | Mild/Marginal                          | Average                             | Mild/Marginal                         | Average                           |

**Supplemental Material S6.** Clinical Evaluation of Language Fundamental (CELF-4).

*Note.* Scaled scores used for calculating the Core Language Index are in bold. Standard Scores are sets of scores with similar means and standard derivation, so that they can be compared. SD: standard deviation. Confidence intervals have been calculated with a Typical Error of Measurement of 95%.
