# Supplementary material
Source: publisher figshare collection journal article supplement (https://asha.figshare.com/articles/dataset/_/21561714)
Supplement: Supplementary file 5 [file 1]

| Scale                                | Sum of<br>scaled scores | Standard<br>score | Percentil<br>rank | Range of<br>values | Qualitative<br>classification | Normal<br>curve<br>equivalent |
|--------------------------------------|-------------------------|-------------------|-------------------|--------------------|-------------------------------|-------------------------------|
| Quantitative Reasoning Index (QRI)   | 29                      | 125               | 95                | 116-130            | High                          | 4.24                          |
| Auditory Working Memory Index (AWMI) | 18                      | 94                | 34                | 87-102             | Medium                        | 3.35                          |
| Nonverbal Index (NVI)                | 64                      | 105               | 63                | 99-111             | Medium                        | 3.35                          |
| General Ability Index (GAI)          | 49                      | 99                | 47                | 92-106             | Medium                        | 3.35                          |
| Cognitive Proficiency Index (CPI)    | 39                      | 98                | 45                | 91-106             | Medium                        | 3.97                          |

**Supplemental Material S5.** The Wechsler Intelligence Scale for Children, Fifth Edition (WISC-V).

Summary of composite scores (Secondary Index Scales).

*Note.* Confidence intervals (5<sup>th</sup> column) have been calculated with a Typical Error of Measurement of 95%
