# Supplementary material
Source: publisher figshare collection journal article supplement (https://asha.figshare.com/articles/dataset/_/21561714)
Supplement: Supplementary file 6 [file 1]

| Full Scale                       | Subscale                         | Raw score | Scalar score | Percentile range | Equivalent age | TEM  |
|----------------------------------|----------------------------------|-----------|--------------|------------------|----------------|------|
| Verbal Comprehension Index (VCI) | <b>Similarities (S)</b>          | 25        | 13           | 84               | 8.6            | 0.99 |
|                                  | <b>Vocabulary (V)</b>            | 4         | 3            | 1                | <6.2           | 1.04 |
|                                  | (Information) (I)                | 10        | 8            | 25               | 6.6            | 1.56 |
|                                  | (Comprehension) (C)              | 11        | 7            | 16               | <6.2           | 1.47 |
| Visual Spatial Index (VSI)       | <b>Block Design (B)</b>          | 22        | 11           | 63               | 8.2            | 1.37 |
|                                  | Visual Puzzles (VP)              | 12        | 11           | 63               | 7.10           | 1.04 |
| Fluid Reasoning Index (FRI)      | <b>Matrix Reasoning (MR)</b>     | 12        | 9            | 37               | 6.6            | 0.99 |
|                                  | <b>Figure Weights (F)</b>        | 19        | 13           | 84               | 9.10           | 0.79 |
|                                  | (Arithmetic) (A)                 | 19        | 16           | 98               | 9.10           | 1.16 |
| Working Memory Index (WMI)       | Digit Span (DS)                  | 18        | 9            | 37               | 6.10           | 0.90 |
|                                  | Picture Span (PS)                | 26        | 13           | 84               | 9.6            | 1.12 |
|                                  | (Letter-Number Sequencing) (LNS) | 12        | 9            | 37               | 6.10           | 0.85 |
| Processing Speed Index (PSI)     | Coding (C)                       | 20        | 7            | 16               | <6.2           | 1.41 |
|                                  | Symbol Search (SS)               | 24        | 10           | 50               | 6.10           | 1.24 |
|                                  | (Cancellation) (CA)              | 15        | 1            | 0.1              | <6.2           | 1.34 |

**Supplemental Material S3.** The Wechsler Intelligence Scale for Children, Fifth Edition (WISC-V). Summary of test scores (Primary Index Scales).

*Note.* The tests used to calculate the total IQ appear in bold. Optional tests appear into parentheses. TEM: Typical Error of Measurement.
