# Supplementary material
Source: publisher figshare collection journal article supplement (https://asha.figshare.com/articles/dataset/_/21561714)
Supplement: Supplementary file 7 [file 1]

## Supplemental Material S7. Conversation 1.

@Begin

@Languages: spa

@Participants: CHI Informant, FAT Father, MOT Mother, SPL Therapist

@Options: CA

@ID: spa|CHROMOLANG|CHI|6;9|male|||Informant|||

@ID: spa|CHROMOLANG|FAT|||Father|||

@ID: spa|CHROMOLANG|MOT|||Mother|||

@ID: spa|CHROMOLANG|SPL|||Therapist|||

@Transcriber: Maite Fernández Urquiza

@Time Duration: 00:01:49

@Media: CHROMOLANG8\_JGR1 video

@Date: 09-NOV-2019

@Location: Córdoba

@Situation: Room at the Speech Language Therapist's place

@Activities: CHI is playing and talking with his parents and SPL

@Comment: Microdeletion in 16p11.2

\*SPL: entonces cuando perdemos Jose cómo estamos ?

\*CHI: 0 [=! looks down].

\*SPL: mira [/] mira los niños <del cubo> [>] .

%sit: on the table there is a big cube and on each of its sides there is a face which express a different emotion

\*FAT: a ver@i [<] vente (.) vente aquí  
[=! pointing to a place close to the table].

\*SPL: cuando perdemos <cómo estamos> [>] ?

\*CHI: 0 [=! looks to the cube with an angry face].

\*FAT: vente aquí cariño [<] que no pasa nada  
[=! holds CHI's arm and pulls slightly but CHI tries to go away].

\*SPL: <no te enfades> [>] [=! CHI is blatantly upset] .

\*FAT: oye@i [<] [=! prevents CHI from going away] venga@i  
[=! gently pulls CHI close to the table] .

\*MOT: mira@i ven (.) Jose (.) mira@i ven [=! showing CHI the cube] ven  
conmigo !

\*CHI: 0 [=! comes close to MOT].

\*FAT: &cuá &co qué cara tienes tú ahora mismo [=! pointing to the cube] ?

\*CHI: 0 [=! looks to the cube].

\*MOT: cómo estás tú [=! looking to the faces on the cube] ?

\*CHI: 0 [=! looks to the cube].

\*FAT: búscate !

\*MOT: está:s sorprendido [=! pointing to a surprised face on the cube] ?

\*CHI: no [=! looks attentively to the face on the cube, shakes head no].

\*MOT: está:s (..) xxx xxx xxx  
[=! MOT fails to recognize de emotion expressed by the face] ?

\*FAT: no (.) tímido [=! smiling] .

\*MOT: tímido xxx xxx ah@i vale@i !

\*FAT: aquí [>] [=! shows CHI on the cube an angry face].

\*MOT: estás [<] ?

\*CHI: hum@i !

%sit: CHI recognizes the emotion on the face, seems disgusted, and turns his back to his parents

%xrepr: \$i5:MQT:RVP:INT

\*MOT: estás así como esa niña?

%sit: FAT looks at SPL and smiles while pointing to CHI

\*CHI: 0 [=! keeps turning his back to everybody] .

\*MOT: cómo estás?

\*MOT: ven (.) díselo a Salud  
[=! MOT tries to hold CHI by his arm].

\*CHI: 0 [=! reacts violently and doesn't let MOT to grab him].

\*MOT: explícale <porque ella no lo está viendo [=! showing EMB] > [>] !

\*FAT: díselo tú tú tú [<] [=! to CHI] !

\*MOT: explícale tú <cómo estás> [>] !

\*FAT: está enfadado@d conmigo [<] pero: e: díselo a ella !

%sit: touches CHI's back slightly and CHI turns around, he seems to be really upset

\*SPL: es que yo no sé qué te pasa porque como no te conozco: (.) dime qué te pasa.

\*MOT: explícale .

\*CHI: es que (.) <e:stoy ponie:ndo> [\*] hasta de los nervios  
[=! closed articulation to express anger,impaired prosody].

%err: estoy poniendo=me estoy poniendo \$MOR \$SYN

%xrepr: \$i5:MMN:ORD:OMI; \$i6:LTI:ADQ

%sit: CHI sits down and looks to the floor before talking, after talking he breathes loudly and anxiously.

\*MOT: de los nervios [=! MOT imitates CHI's articulation, joking].

\*FAT: me estoy poniendo hasta de los nervios  
[=! FAT reports what CHI has said, smiles] .

\*MOT: pero: y por qué te estás poniendo de los nervios ?

\*CHI: porque↑ (.) no me dejá↑is [=! impaired prosody].

%sit: CHI gets up and turns his back to everybody again.

\*MOT: y qué ha pasado para que te pongas así?

\*CHI: 0 [=! shakes his head no, seems to be thinking].

\*MOT: a ver@i .

\*CHI: no [?] [=! shouting] !

\*FAT: por [/] por qué te has puesto así  
[=! slightly taps CHI's back, trying to grab his attention]?

\*CHI: porque (.) no (.) me ha hecho <un pizco> [\*] de gracia  
[=! turns around, effortful pronunciation and impaired prosody]!

%err: un pizco=ni una pizca \$LEX

%xrepr: \$i5:MMN:ORD:OMI; \$i5:MMN:ORD:SST; \$i6:LTI:ADQ

\*FAT: <no te ha hecho un pizco de gracia> [>]  
[=! reporting CHI's utterance].

\*MOT: el qué no te ha hecho ni pizca de gracia [<] ?

\*CHI: 0 [=! blows] . [+ trn]

%xepr: \$et3:GSA  
 \*MOT: qué no te ha hecho ni +/.  
 \*FAT: qué no te ha hecho gracia (.) qué no te ha gustado ?  
 \*CHI: 0.  
 \*MOT: que te enseñe el dado (.) no te ha gustado ?  
 \*CHI: n:o !  
 \*MOT: o qué no te ha gustado ?  
 \*SPL: perder .  
 \*CHI: e:s [/ -] esta: [/ -] este juego [=! crossing his arms].  
 %xepr: \$i5:MMN:REF; \$i5:MMN:REF; \$i5:MQL:ASW:IMM  
 \*FAT: qué juego (.) este (.) no te ha gustado [=! pointing] ?  
 \*CHI: no [>].  
 \*MOT: el juego [<] sí te ha gustado porque te lo estabas pasando bien.  
 \*MOT: lo que no te ha gustado qué ha sido ?  
 \*CHI: esto [=! grabbing a box and pointing to it]!  
 %xepr: \$et4:RPR:OTH:PER; \$i5:MQL:ASW:PER  
 \*SPL: no [>] .  
 \*MOT: no [<] (.) pero por <qué no te ha gustado> [>] ?  
 \*CHI: esto [<] [=! grabbing the cube with faces] !  
 %xepr: \$i5:MRL:ASW:PER  
 \*MOT: te ha gustado jugar ?  
 \*CHI: ya no me <ha gus↑tado> [\*] [=! runs away, impaired prosody].  
 %err: ha gustado=gusta \$MOR \$SYN  
 %xepr: \$i5:MRL:ASW:TNG  
 \*MOT: ya no te gusta [=! grabs CHI's arm and pulls him close] ?  
 \*MOT: por qué no te gusta ya ?  
 \*CHI: voy a guardarlo [=! grabs the box and puts it in the closet] .  
 %xepr: \$i5:MRL:RPT:TNG  
 @End

## Conversation 2

@Begin

@Languages: spa

@Participants: CHI Informant, FAT Father, MOT Mother, SPL Therapist

@Options: CA

@ID: spa|CHROMOLANG|CHI|6;9.|male|||Informant|||

@ID: spa|CHROMOLANG|FAT|||Father|||

@ID: spa|CHROMOLANG|MOT|||Mother|||

@ID: spa|CHROMOLANG|SPL|||Therapist|||

@Transcriber: Maite Fernández Urquiza

@Time Duration: 00:02:59

@Media: CHROMOLANG8\_1 video

@Date: 09-NOV-2019

@Location: Córdoba

@Situation: Room at the Speech Language Therapist's place

@Activities: CHI is retelling a movie to SPL

@Comment: Microdeletion in 16p11.2

\*SPL: oye@i y has visto por eje:mplo: e: <de dibujo:> [/ -] de dibujos de Disney has visto alguna peli@d que te haya gustado ?

\*FAT: sí:↑ Pinocho [>].

\*CHI: he: +/.

\*SPL: por ejemplo: [<] <Pinocho l'has@d visto> [!] ?

\*CHI: sí .

\*SPL: venga@i pues cuéntamela que yo no la he visto y me la he perdido .

\*CHI: y: [/] y yo he visto la película de Pinocho dos veces .

\*SPL: pues venga@i cuéntame de qué va (.) el tema porque es que yo↑ no la he visto (.) <cuéntamela cariño> [>].

\*CHI: &e:s estaba haciendo de todo↑ (.) &is con su padre etaba [/ -] <estaba:> [>] [=! impaired prosody and stumbling speech].

%xrepr: \$et3:DRA:DIS; \$i6:LTI:IDQ; \$et3:DRA:DIS;

\*SPL: muy bien [<].

\*CHI: +, <iendo y la> [?] y <la hada> [\*] l'ha@d convertido a Pinocho 0en <un Pinocho de [/ -] vivo> [!]

%err: la hada=el hada \$MOR

%sit: illustrates the story with gestures, very expressive prosody despite his difficulties to speak fluently.

%xrepr: \$i5:MMN:ORD:SST; \$i5:MMN:ORD:OMI; \$i5:MMN:REF

\*SPL: jolines@i no me lo puedo creer !

%sit: MOT is laughing

\*SPL: y qué más (.) cuéntame !

\*SPL: porque lo estás contando muy bien (.) me están entrando ganas de verla.

\*CHI: é:l [/] él un día pasó [?] [/ -] estaba: encontrando [\*] Pinocho a su padre y: al pececito y al ga (.) to [=! avoids visual contact with SPL] .

%err: encontrando=buscando \$LEX

%xrepr: \$i5:MMN:REP; \$i5:MMN:REF; \$i5:MMN:ORD:SST;

\*SPL: muy bien !

\*CHI: es [/ -] <y era> [?] &u la ballena <y e:ra> [?] se [\*] entró humo (.)  
dentro de la boca de la (.) ballena negra y <se estornudar> [\*]  
[=! stumbling speech and impaired prosody, avoids visual contact with SPL].

%err: se=le \$MOR \$SYN; se estornudar=estornudó \$MOR \$SYN

%xepr: \$i5:MMN:REF; \$et3:DRA:DIS; \$i5:MMN:ORD:SST; \$i5:MMN:ORD:ADI;  
\$i5:MMN:ORD:SST

\*CHI: ha hecho la ballena +"/.

\*CHI: +" achús@o !

\*SPL: qué bueno [=! laughing] !

\*CHI: <a:ra [\*] &a otra vez> [/] ara [\*] [>] otra vez↑ +/.

%err: ara=ahora \$PHO; ara=ahora \$PHO

%xepr: \$i5:MMN:ORD:OMI; \$et3:DRA:DIS; \$i5:MMN:REP

\*SPL: qué bueno [<] !

\*CHI: +, entra:↑ (.) por la nariz (.) [=! touches his nose] <hace otra>  
[/ -] se [\*] estornuda otra vez +"/.

%err: se=0 \$MOR \$SYN

%xepr: \$i5:MMN:REF

\*CHI: +" achús@o !

\*SPL: madre mía@i qué estornudos ,, no ?

\*CHI: sí: [=! smiles but keeps looking away, as if he were thinking].

\*SPL: y entonces al estornudar qué pasó (.) qué salió de la ballena ?

\*CHI: a: [\*] su padre↑ y al [\*] gato y el [/ -] al [\*] pececito .

%err: a=0 \$MOR \$SYN; al=el \$MOR \$SYN; al=el \$MOR \$SYN

\*SPL: qué bien !

%sit: CHI shakes his arms

\*SPL: y Pinocho ?

\*SPL: te gusta el personaje de Pinocho ?

\*SPL: qué hacía Pinocho ?

\*CHI: &e: estaba: [=! bending himself against FAT] +//.

%xepr: \$et3:DRA:DIS; \$i5:MQT:RVP

\*FAT: así [=! whispering].

%sit: FAT holds CHI and puts him in an adequate position

\*CHI: a: [=! CHI bends himself over the table and back, shouting] .

%xepr: \$et3:LCA

\*FAT: Pinocho qué era (.) qué era Pinocho ?

\*CHI: ara [\*] se ha convetido [\*] un [/ -] nun [\*] niño de verdad  
[=! jumps while rising his arms up] !

%err: ara=ahora \$PHO; convetido=convertido \$PHO; nun= en un \$PHO \$MOR

\*SPL: a:h@i eso es lo que más te gusta (.) claro:@i !

@End

### Conversation 3

@Begin

@Languages: spa

@Participants: CHI Informant, MOT Mother

@Options: CA

@ID: spa|CHROMOLANG|CHI|6;11.|male|||Informant|||

@ID: spa|CHROMOLANG|MOT|||Mother|||

@Transcriber: Maite Fernández Urquiza

@Time Duration: 00:09:50

@Media: CHROMOLANG\_8\_JGR3 video

@Date: 15-JAN-2020

@Location: Puente Genil, Córdoba

@Situation: Room at the child's place

@Activities: CHI is talking with MOT

@Comment: Microdeletion in 16p11.2

\*MOT: y de qué va el libro venga@i pero: <me lo cuentas porfi> [>] .

\*CHI: bien [<] (...) hum@i (..) Ana↑ (.) sobre todo↑ <quería &com> [/] quería: come:r bombone:s↑ ver la tele↑ y: [/] y sobre: [/] a: invitar a Julio e: [=! exaggerated prosody] +/.

%sit: CHI is manipulating a remote while he speaks

%xpr: \$et3:DRA:DIS; \$i5:MMN:REF; \$i5:MMN:REP; \$i5:MMN:REF; \$et3:DRA:FIL

\*MOT: quién es Julio ?

\*CHI: es su mejor amigo .

\*MOT: <ala@i tú también tienes un amigo que se llama Julio> [!] „ verdad ?

\*CHI: de prime:ro [\*] curso [>] .

%err: primero=primer \$MOR

%xpr: \$i5:MMN:ORD:SST

\*MOT: de primero [<] de qué ?

\*MOT: de primer curso de qué ?

\*MOT: <del cole> [>] ?

\*CHI: de arri:ba [=! pointing up with his hand and arm].

%xpr: \$i5:MRL:ASW:TNG:ICOM; \$et3:GSA

\*MOT: ah@i del cole (.) pero arriba qué (.) arriba porque está la clase e:n la primera planta „ no ?

\*CHI: sí [=! looks to MOT].

\*MOT: sí (.) bueno pues venga@i !

\*CHI: <el de abajo> [/] <el de> [/] el 0de abajo es la primera e: +/.

%xpr: \$i5:MMN:REF; \$i5:MMN:REF; \$i5:MMN:ORD:OMI; \$et3:DRA:FIL; \$i5:MQL:RPT:WOR

\*MOT: es la baja (.) abajo será la baja .

\*CHI: 0 [=! coughs repeatedly] .

\*MOT: <ay@i qué tos> [!] tápate: la boqui:ta cuando tosas .

\*CHI: y e: el [/] el del prime:ro (.) el segundo (.) el del tercero cua:rto quinto [!] y se:xto .

%xpr: \$et3:DRA:FIL; \$i5:MMN:REP; \$i5:MRL:RPT:NRL

\*MOT: venga@i seguimos con el libro [=! caresses CHI's hair] (.) entonces

Ana quería comer bombones [>].

\*CHI: bombones [<] y: +/.

\*MOT: y qué más ?

\*CHI: +, y ver la tele (.) <i:s a sobre> [?] invitar a Julio (.) es (.) su mejor amigo.

%xrepr: \$i5:MQT:RUT:PER

\*MOT: uhum@i y qué pasó ?

\*MOT: qué más contaba el libro ?

\*MOT: solo eso (.) o contaba más cosas ?

\*CHI: <de to:do> [/] de t:odo [=! shouting, elevates pitch exaggeratedly] !

%xrepr: \$i6:LTI:IDQ; \$i5:MMN:REP

\*MOT: pero eso: de todo: yo no sé qué es (.) de todo: yo qué sé en el libro: salía:n carreras de coches?

\*CHI: no [=! looks to MOT].

\*MOT: ah@i pues entonces no cuenta de todo.

\*CHI: hum@i y su madre está de mal humor .

\*MOT: por qué ?

\*CHI: porque no de [/] no a bombones [=! shakes head no] hum@i +/.

%xrepr: \$i5:MRL:ASW:PER; \$i5:MMN:REF; \$i5:MMN:ORD:OMI; \$et3:GSA; \$et3:DRA:FIL

\*MOT: cómo que no a bombo +//.

\*CHI: +, no: la [/] a la te:le: ↑ +/.

%xrepr: \$i5:MMN:REF

\*MOT: le decía que no a todo „ no?

\*CHI: +, no invitar a Julio ↑ .

%xrepr: \$i5:MRL:ASW:PER

\*MOT: y Ana qué (.) Ana cómo se lo tomó eso?

\*CHI: porque su madre no &que xxx xxx xxx xxx está i: e: xxx xxx y estaba [?] de mal humor.

%xrepr: \$et3:DRA:DIS; \$et3:DRA:FIL; \$i5:MRL:ASW:PER

\*MOT: <pero Ana:> [/] y Ana qué pensaba de eso ?

\*CHI: (0.6) eso (0.3) de todo eso habla [?] el li:bro .

%xrepr: \$i5:MRL:ASW:TNG

\*MOT: uhum@i <y tú> [/] y tú cuando estás de mal humor cómo [/] qué haces?

\*CHI: (0.3) que: [/] que: [/] <que a &luc> [/] que: xxx yo: &regañ <mayor a regañar> [?] a mi primo por [/] a mi primo Lucas.

%xrepr: \$i5:MMN:REP; \$i5:MMN:REP; \$et3:DRA:DIS; \$i5:MMN:REF; \$et3:DRA:DIS; \$i5:MMN:REF; \$et3:DRA:PHR:SRG:SYN

\*MOT: pero tú solo te pones de mal humor con Lucas ?

\*CHI: no: bombo:nes [=! shakes head no] hum@i no: a la te:le .

%xrepr: \$i5:MRL:ASW:PER; \$et3:DRA:FIL

\*MOT: eso le dices tú a Lucas (.) <o eso e:s> [/] o eso es lo que te dicen a ti cuando estás de mal humor ?

\*CHI: y: [/] y [/] y no a invitar a sus amigos .

%xrepr: \$i5:MRL:ASW:PER;

\*MOT: pero eso tú se lo dices a Lucas ?

\*CHI: porque +/.

\*MOT: pero tú no eres ni el papá ni la mamá de Lucas (.) eso se lo tendrán

que deci:r quiénes ?

\*CHI: sus padres [=! shouting].

\*MOT: sus padres (.) claro@i (.) tú no puedes castigarlo !

\*MOT: tú quién eres ?

\*CHI: soy Jose (.) tengo casi cinco años más que mi primo Lucas .

%xrepr: \$i5:MRL:ASW:TNG

\*MOT: claro@i pero tú eres su primo y son sus papás quienes le tienen que castigar.

\*MOT: www.

\*MOT: tienes casi cinco años más que: [/] que Lucas „ no ?

\*CHI: uhum@i.

\*MOT: eso qué significa (.) de casi cinco más ?

\*CHI: Oque tendrás [\*] casi sie:te <o así> [?] .

%err: tendrás=tengo \$MOR \$SYN

%xrepr: \$i5:MMN:ORD:OMI; \$i5:MMN:ORD:SST

\*MOT: a:nda@i (.) que tienes casi siete !

\*MOT: y qué día es tu cumple ?

\*MOT: cuéntame cómo lo vamos a celebrar!

\*CHI: nos quedan dieciséis días↑ .

%xrepr: \$i5:PIM:PMQT:ADQ

\*MOT: dieciséis días quedan para tu cumple ?

\*MOT: los has contado tú solo?

\*CHI: sí &\*MOT: sí [>]?

\*CHI: uno [<] dos tres <cuatro cinco seis> [>] [=! counts with fingers].

%xrepr: \$i5:MQT:RUT:LIT

\*MOT: sí sí sabes contar hasta dieciséis [<].

\*CHI: +, hum@i <seis siete: [/] siete> [>].

%xrepr: \$i5:MMN:REP

\*MOT: oye@i y dónde lo vas a celebrar↑ [<] (.) cuéntame.

\*CHI: +, ocho: nueve: die:z once: doce: trece: catorce: quince y dieciséis.

%xrepr: \$i5:MRL:RPT:PER

\*MOT: muy bien es el treinta y uno (.) sabes contar súper bien .

\*MOT: oye@i que dónde lo quieres celebrar tu cumple .

\*CHI: en el [/ -] con una tarta de Lacasitos

[=! increased voice volume, almost shouting].

%xrepr: \$i5:MMN:REF; \$i5:MRL:ASW:TNG

\*MOT: <con un> [/ -] pero dónde en qué sitio ?

\*CHI: e: en el MacDonalds

[=! shouting, slow rhythm, seems to be announcing something important]!

%xrepr: \$et3:DRA:FIL

\*MOT: muy bien (.) y a quiénes vamos a invitar ?

\*CHI: a todos mis amigos .

\*MOT: hum@i ?

\*CHI: eso.

\*MOT: y a qué vais a jugar (.) cuéntame <a qué te va> [/ -] a qué vais a jugar allí ?

\*CHI: (0.5) hum@i (0.5).

%xrepr: \$i5:MQT:RVP:INT

\*MOT: no sabes a qué vais a jugar ?

\*CHI: a todos más [?] .

\*MOT: bueno pues cuéntame que el otro día estuviste en el cumpleaños de Alberto allí.

\*MOT: y cuéntame (.) a qué jugaste ?

\*CHI: &e eran cinco [/ -] diez menos [=! illustrator with both hands].

%xrepr: \$set3:DRA:DIS; \$i5:MMN:REF; \$set3:GSA; \$i5:MRL:ASW:TNG; \$i5:SQL:ASW:IMM

\*MOT: e: cómo que diez menos (.) no me entero .

\*CHI: martes lunes <domingo sábado> [>] .

%xrepr: \$set4:RPR:OTH:PER

\*MOT: vale@i vale@i pero no me cuentes los días [<].

\*CHI: y: [/] y viernes .

%xrepr: \$i5:MMN:REP; \$set4:RPR:OTH:PER

\*MOT: sí <fue el viernes de la semana pasada> [>].

\*CHI: <diez [/ -] cinco [/] cinco> [<] días menos .

%xrepr: \$i5:MMN:REF; \$i5:MMN:REP; \$i5:MOT:RUT:PER

\*MOT: sí (.) hace cinco días que celebraste el cumpleaños de Alberto .

\*MOT: pero: a qué jugaste en el cumpleaños ?

\*MOT: porque había muchos niños (.) quiénes eran esos niños (.) a qué jugaste (.) cuéntamelo .

\*CHI: <eran sus &a> [/] era [\*] sus amigos .

%err: era=eran \$MOR \$SYN

%xrepr: \$set3:DRA:DIS; \$i5:MMN:REP; \$i5:MMN:ORD:SST

\*MOT: sus amigos de qué (.) de Alberto ?

\*CHI: sí .

\*MOT: sí↑ y conociste: [/] te sabes el nombre de alguno ?

\*MOT: le preguntaste a alguno el nombre ?

\*CHI: no [=! shakes head no, seems sad or disgusted].

%xrepr: \$set3:GSA

\*MOT: no?

\*MOT: pero con ellos sí jugaste „ verdad ?

\*CHI: 0.

\*MOT: jugaste con ellos o no ?

\*CHI: (0.3) que: es e: &mes esta [\*] noche yo <te &e:s> [/ -] yo <me sudaba> [\*].

%err: esta=esa \$MOR; me sudaba=sudaba \$MOR

%xrepr: \$set3:DRA:FIL; \$set3:DRA:DIS; \$i5:MMN:ORD:SST; \$set3:DRA:DIS; \$i5:MMN:REF; \$i5:MMN:ORD:ADI; \$set3:DRA:PHR:SRG:SYN; \$i5:MRL:ASW:TNG

\*MOT: era de noche (.) sudaste mucho ?

\*CHI: 0 [=! coughs, nods]. [+ trn]

%xrepr: \$set3:GSA

\*MOT: por qué ?

\*CHI: porque yo esta:ba: <&mu muy &cansa> [/ -] mucho [\*] cansa:do .

%err: mucho=muy \$MOR \$SYN

%xrepr: \$set3:DRA:DIS; \$set3:DRA:DIS; \$i5:MMN:REF; \$i5:MMN:ORD:SST

\*MOT: estabas muy cansado?

\*MOT: y a qué [/ -] por qué estabas cansado ?

\*CHI: porque no [/] <no &pod> [/ -] no <me paraba> [\*] de sudar .

%err: me paraba=paraba \$MOR

%xexpr: \$i5:MMN:REP; \$et3:DRA:DIS; \$i5:MMN:REF; \$i5:MMN:ORD:ADI;  
\$et3:DRA:PHR:SRG:SYN; \$i5:MQL:ASW:WOR

\*MOT: pero bueno (.) vamos a ver (.) sudabas porque estabas cansado y  
estabas cansado porque no parabas de sudar (.) por qué sudaste tanto?

\*CHI: 0 [=! coughs] .

\*MOT: que por qué sudaste tanto .

\*CHI: porque e: (.) <por qué está> [?] .

%xexpr: \$et3:DRA:FIL;

\*MOT: que por qué sudaste tanto, Jose .

\*MOT: porque estabas sentado tomando el fresco?

\*CHI: sí.

%xexpr: \$i5:MQL:ASW:IMM

\*MOT: sí?

\*CHI: hum@i [=! nods] sí viendo <el Brutis> [?] [/ -] <el &vid> [/ -] el  
vídeo de Brutespunti[?] .

%sit: CHI keeps playing with the remote

%xexpr: \$i5:MMN:REF; \$et3:DRA:DIS; \$i5:MMN:REF; \$i5:MQL:ASW:FAB

\*MOT: no lo creo (.) no lo creo que sudaste en el cumpleaños por eso .

\*MOT: por qué sudaste ?

\*CHI: porque estaba yo cansado .

%xexpr: \$i5:MQL:ASW:WOR:PER

\*MOT: y los otros niños por qué sudaban ?

\*CHI: puf@i .

%xexpr: \$i5:MQT:RVP:INT

\*MOT: porque no paraban de qué „ Jose ?

\*CHI: de correr.

\*MOT: de correr ?

\*CHI: y no se cansaban [=! shakes head no].

\*MOT: y tú te cansabas?

\*CHI: sí [=! looks to MOT].

\*MOT: sí?

\*CHI: sí.

\*MOT: tú te cansabas?

\*CHI: sí.

\*MOT: vaya por dios@i y los otros niños tú crees que no se cansaban ?

\*CHI: no .

%sit: CHI keeps playing with the remote

\*MOT: y a qué juegos jugasteis?

\*CHI: es e: (..) algunos pillan (.) algunos se quedan <y se pi>  
[/ -] y pillan a otro: (.) se queda otro y pillan otro.

%sit: CHI is constantly moving while talking

%xexpr: \$et3:DRA:FIL; \$i5:MMN:REF; \$i5:MQT:VUT; \$et3:DRA:PHR:SRG:SYN

\*MOT: y cómo se llama ese juego ?

\*CHI: a pillan pillan.

\*MOT: vaya@i a pillan pillan !

@End
